# Supplementary material
Source: Springer Nature journal article supplement (https://www.springermedizin.de/resource/supplementary/13002_2007_103_MOESM1_ESM.pdf/9627164)
Supplement: MOESM1 [file 9627164]

## Additional file 1. Medicinal plant species sold in the Trujillo and Chiclayo Markets

| Family           | Scientific Name                                              | Common Name                                                         |
|------------------|--------------------------------------------------------------|---------------------------------------------------------------------|
| ACANTHACEAE      | <i>Fittonia</i> spp.                                         | Motalio                                                             |
| ADIANTACEAE      | <i>Adiantum concinnum</i> Wild. ex H.B.K.                    | Culantrillo                                                         |
| ADIANTACEAE      | <i>Pellaea ternifolia</i> C. Chr.                            | Cuti Cuti                                                           |
| AIZOACEAE        | <i>Tetragonia crystallina</i> L'Herit                        | Hierba de la Señorita                                               |
| ALGAE            | <i>Giartina</i> spp.                                         | Algae Marinas                                                       |
| ALGAE            | <i>Nostoc</i> spp.                                           | Algas                                                               |
| ALSTROEMERIACEAE | <i>Bomarea dulcis</i> (Hook.) Beauv.                         | Hierba de Gallo                                                     |
| AMARANTHACEAE    | <i>Alternanthera brasiliana</i> (L.) Kuntze                  | Hierba del Oso (Veronica)                                           |
| AMARANTHACEAE    | <i>Alternanthera halmifolia</i> (Lam.) Standley & Pittier    | Morada                                                              |
| AMARANTHACEAE    | <i>Alternanthera porrigens</i> (Jacquin) Kuntze              | Moradilla                                                           |
| AMARANTHACEAE    | <i>Iresine herbstii</i> Lindley                              | Colores (Zangurache)                                                |
| AMARYLLIDACEAE   | <i>Eustephia coccinea</i> Cav.                               | Para Para (Puma Para)                                               |
| AMARYLLIDACEAE   | <i>Stenossemon flammidum</i> Raf.                            | Cholo Lindo                                                         |
| ANACARDIACEAE    | <i>Mauria heterophylla</i> H.B.K.                            | Chacur (Feregreco, Hierba Sanchez, Tres Hojas, Trinidad)            |
| ANACARDIACEAE    | <i>Schinus molle</i> L.                                      | Molle                                                               |
| ANNONACEAE       | <i>Annona muricata</i> L.                                    | Hoja de Huanabana                                                   |
| APIACEAE         | <i>Ammi visnaga</i> (L.) Lam.                                | Bisnaga                                                             |
| APIACEAE         | <i>Apium graveolens</i> L.                                   | Apio                                                                |
| APIACEAE         | <i>Arracacia xanthorrhiza</i> Bancroft                       | Racacha                                                             |
| APIACEAE         | <i>Coriandrum sativum</i> L.                                 | Culantro                                                            |
| APIACEAE         | <i>Daucus montanus</i> H. & B. ex Spreng.                    | Hierba de Zorrillo (Zanaoria de Zorro)                              |
| APIACEAE         | <i>Foeniculum vulgare</i> P. Miller                          | Hinojo (Hojas de Anis)                                              |
| APIACEAE         | <i>Petroselinum crispum</i> (Miller) A.W. Hill               | Perejil                                                             |
| APIACEAE         | <i>Pimpinella anisum</i> L.                                  | Anis (Anis Criollo)                                                 |
| APOCYNACEAE      | <i>Mandevilla</i> cf. <i> trianae</i> Woodson                | Bejuco                                                              |
| APOCYNACEAE      | <i>Nerium oleander</i> L.                                    | Laurel                                                              |
| APOCYNACEAE      | <i>Plumeria rubra</i> L.                                     | Pachuli                                                             |
| APOCYNACEAE      | <i>Thevetia peruviana</i> (Pers.) Schum.                     | Cabalonga (Camalonga, Maichil)                                      |
| APOCYNACEAE      | <i>Vallesia glabra</i> (Cav.) Link.                          | Cuncuno                                                             |
| AQUIFOLIACEAE    | <i>Ilex guayusa</i> Loes                                     | Guayusa (Citrodora)                                                 |
| ARALIACEAE       | <i>Oreopanax eriocephalus</i> Harms                          | Mano de León, Maque Maque, Mano de Onza                             |
| ARALIACEAE       | <i>Panax ginseng</i> Mey.                                    | Ginseng                                                             |
| ARECACEAE        | <i>Bactris</i> spp.                                          | Chonta                                                              |
| ASCLEPIADACEAE   | <i>Sarcostemma clausum</i> (Jacquin) Schultes                | Hierba Judia (Marrajudio)                                           |
| ASPHODELACEAE    | <i>Aloe vera</i> (L.) Burm f.                                | Sabila                                                              |
| ASTERACEAE       | <i>Acanthoxanthium spinosum</i> (L.) Furreau                 | Juan Alonso, Garcia Alonso                                          |
| ASTERACEAE       | <i>Achillea millefolium</i> L.                               | Milenrama                                                           |
| ASTERACEAE       | <i>Ambrosia peruviana</i> Willd.                             | Ajenjo (Altamis, Llatama Negra Malera, Manzanilla de Muerto, Marco) |
| ASTERACEAE       | <i>Baccharis genistelloides</i> (Lam.) Pers.                 | Karqueja (Simba Simba)                                              |
| ASTERACEAE       | <i>Baccharis vaccinioides</i> H.B.K.                         | Hierba de Sigueme Sigueme                                           |
| ASTERACEAE       | <i>Bidens pilosa</i> L.                                      | Amor Seco (Cadillo)                                                 |
| ASTERACEAE       | <i>Calendula officinalis</i> L.                              | Calendula                                                           |
| ASTERACEAE       | <i>Chuquiraga spinosa</i> sp. <i> huamanpinta</i> C. Ezcurra | Chuquiragua (Huamanpinta)                                           |
| ASTERACEAE       | <i>Chuquiragua weberbaueri</i> Tovar                         | Amaro                                                               |
| ASTERACEAE       | <i>Cronquistianthus lavandulifolius</i> DC.                  | Pulmonaria                                                          |
| ASTERACEAE       | <i>Cynara cardunculus</i> L.                                 | Alcachofa                                                           |

|                 |                                                             |                                                              |
|-----------------|-------------------------------------------------------------|--------------------------------------------------------------|
| ASTERACEAE      | <i>Diplostephium sagasteguii</i> Cuatrecasas                | Hierba del Tigre                                             |
| ASTERACEAE      | <i>Eupatorium gayanum</i> Wedd.                             | Asma chilca (Chilco)                                         |
| ASTERACEAE      | <i>Flaveria bidentis</i> (L.) Kuntze                        | Mata Gusano                                                  |
| ASTERACEAE      | <i>Gnaphalium americanum</i> Mill.                          | Lechugilla, Queta Queta, Queto Queto, Lengua del Perro       |
| ASTERACEAE      | <i>Loricaria ferruginea</i> (R. & P.) Wedd.                 | Palmita                                                      |
| ASTERACEAE      | <i>Loricaria pauciflora</i> Cuatr.                          | Palma                                                        |
| ASTERACEAE      | <i>Loricaria thyrsoides</i> (Cuatr.) Dillon                 | Trensilla                                                    |
| ASTERACEAE      | <i>Matricaria frigidum</i> (H.B.K.) Kunth                   | Manzanilla de olor (Manzanilla Dulce y Amarga)               |
| ASTERACEAE      | <i>Matricaria recutita</i> L.                               | Manzanilla (Dulce y Amarga), Labanda, Manzanillón            |
| ASTERACEAE      | <i>Monactis flaverioides</i> H.B.K.                         | Churguis, Hierba del Susto (y Amarilla)                      |
| ASTERACEAE      | <i>Oritrophium peruvianum</i> (Lam.) Cuatrec.               | China Linda (Hierba del Sol, Vira Vira, Wiña Wiña)           |
| ASTERACEAE      | <i>Paranephelius uniflorus</i> Poepp. & Endl.               | Carapa de Chanco (Pacha Rosa)                                |
| ASTERACEAE      | <i>Perezia multiflora</i> (H. & B.) Lessing                 | Escorcionera                                                 |
| ASTERACEAE      | <i>Perezia pungens</i> (H.B.K.) Cass.                       | Lengua Vaca                                                  |
| ASTERACEAE      | <i>Picrosia longifolia</i> D. Don                           | Achicoria (Chicoria)                                         |
| ASTERACEAE      | <i>Porophyllum ruderale</i> (Jacq.) Cass.                   | Gallinazo (Pata de Gallina)                                  |
| ASTERACEAE      | <i>Pseudognoxis cordifolia</i> (Cass.) Cabr.                | San Juan                                                     |
| ASTERACEAE      | <i>Schkuhria pinnata</i> (Lam.) Kuntze                      | Canchalagua (Canchalagua Chica)                              |
| ASTERACEAE      | <i>Senecio canescens</i> (H.B.K.) Cuatrecasas               | Oreja de Conejo                                              |
| ASTERACEAE      | <i>Senecio chinogeton</i> Wedd.                             | Hornamo (Leon) Amarillo                                      |
| ASTERACEAE      | <i>Senecio pseudotites</i> Grieseb.                         | Arnica                                                       |
| ASTERACEAE      | <i>Smallanthus sonchifolius</i> (Poepp. & Endl) H. Rob.     | Llacon (Yacon)                                               |
| ASTERACEAE      | <i>Sonchus oleraceus</i> L.                                 | Karqueja, Serraja                                            |
| ASTERACEAE      | <i>Spilanthes leiocarpa</i> DC.                             | Turre                                                        |
| ASTERACEAE      | <i>Stevia rebaudiana</i> Bertoni                            | Estevia                                                      |
| ASTERACEAE      | <i>Tagetes elliptica</i> Sm.                                | Supequewa, Supiquegua                                        |
| ASTERACEAE      | <i>Tagetes erecta</i> L.                                    | Clavo de Chino (Claveles Chino, Flores del Muerto, Marigold) |
| ASTERACEAE      | <i>Tagetes filifolia</i> Lag.                               | Anis Serrano                                                 |
| ASTERACEAE      | <i>Tanacetum parthenium</i> (L.) Sch. Bip.                  | Santa Marta                                                  |
| ASTERACEAE      | <i>Taraxacum officinale</i> Wiggers                         | Diente de Leon                                               |
| ASTERACEAE      | <i>Tesaria integrifolia</i> R. & P.                         | Pajaro Bobo                                                  |
| ASTERACEAE      | <i>Trixis cacalioides</i> H.B.K.                            | Añasquero Chico                                              |
| ASTERACEAE      | <i>Weddellia latifolia</i> DC.                              | Chulgan                                                      |
| ASTERACEAE      | <i>Werneria pygmaea</i> H. & A.                             | Halago                                                       |
| BALANOPHORACEAE | <i>Heliosis cayennensis</i> (Swartz) Sprengel               | Huanarpo                                                     |
| BERBERIDACEAE   | <i>Berberis buceronis</i> J.F. Macbride                     | Palo Amarillo                                                |
| BETULACEAE      | <i>Alnus acuminata</i> H.B.K.                               | Aliso                                                        |
| BIGNONIACEAE    | <i>Crescentia cujete</i> L.                                 | Tutuma                                                       |
| BIGNONIACEAE    | <i>Jacaranda acutifolia</i> H. & B.                         | Yarabisca                                                    |
| BIGNONIACEAE    | <i>Tabebuia</i> spp.                                        | Huayacán                                                     |
| BIGNONIACEAE    | <i>Tynnanthus scabra</i> (Hoffm. ex Roem. & Schult.) Schum. | Clavo Huasca                                                 |
| BIXACEAE        | <i>Bixa orellana</i> L.                                     | Achote                                                       |
| BORAGINACEAE    | <i>Borrigo officinalis</i> L.                               | Borraja                                                      |
| BORAGINACEAE    | <i>Cordia alliodora</i> (R. & P.) Oken                      | Ajo Quiro, Ajo Sacha, Ajojero                                |
| BORAGINACEAE    | <i>Cordia lutea</i> Lam.                                    | Flor de Overo                                                |
| BORAGINACEAE    | <i>Heliotropium curassavicum</i> L.                         | Alacran                                                      |
| BORAGINACEAE    | <i>Symphytum</i> spp.                                       | Confrey                                                      |
| BORAGINACEAE    | <i>Tiquilia paronychoides</i> (Phil.) Rich.                 | Flor de Arena (Manita de Raton)                              |
| BRASSICACEAE    | <i>Capsella bursa-pastoris</i> (L.) Medic.                  | Bolsa de Pastor                                              |
| BRASSICACEAE    | <i>Cheiranthus cheiri</i> L.                                | Alalali                                                      |

|                         |                                                                            |                                                        |
|-------------------------|----------------------------------------------------------------------------|--------------------------------------------------------|
| <b>BRASSICACEAE</b>     | <i>Lepidium meyenii</i> Walpers                                            | Maca                                                   |
| <b>BRASSICACEAE</b>     | <i>Rorippa nasturtium-aquaticum</i> (L.) Hayek                             | Berros (Berruco)                                       |
| <b>BROMELIACEAE</b>     | <i>Puya hamata</i> L.B. Sm.                                                | Hierba de Carnero, Lana de Carnejo                     |
| <b>BROMELIACEAE</b>     | <i>Tillandsia cacticola</i> L.B. Sm.                                       | Palmera (Siempre Viva)                                 |
| <b>BURSERACEAE</b>      | <i>Bursera graveolens</i> (H.B.K.) Triana & Planchon                       | Palo Santo                                             |
| <b>CACTACEAE</b>        | <i>Echinopsis pachanoi</i> (Britton & Rose) Friedrich & G. Rowley          | San Pedro                                              |
| <b>CACTACEAE</b>        | <i>Opuntia ficus-indica</i> (L.) Miller                                    | Tuna, Nopal                                            |
| <b>CAMPANULACEAE</b>    | <i>Siphocampylus angustiflorus</i> Schlechtendal                           | Contoya                                                |
| <b>CAPPARIDACEAE</b>    | <i>Capparis crotonoides</i> H.B.K.                                         | Bichayo                                                |
| <b>CAPRIFOLIAEAE</b>    | <i>Lonicera japonica</i> Thunberg                                          | Madre Selva                                            |
| <b>CAPRIFOLIAEAE</b>    | <i>Sambucus peruviana</i> H.B.K.                                           | Sauco (Tilo)                                           |
| <b>CARICACEAE</b>       | <i>Jacartia digitata</i> (Poepp. & Endl.) Solms-Lang.                      | Contra Hechizo                                         |
| <b>CARYOPHYLLACEAE</b>  | <i>Dianthus caryophyllus</i> L.                                            | Clavel (Serrano)                                       |
| <b>CHENOPODIACEAE</b>   | <i>Chenopodium ambrosioides</i> L.                                         | Paico (Espesote)                                       |
| <b>CHLORANTHACEAE</b>   | <i>Hedyosmum racemosum</i> (R. & P.) G. Don.                               | Asarcito                                               |
| <b>CHRYSOBALANACEAE</b> | <i>Coupeia</i> sp.                                                         | Acharachango                                           |
| <b>CLETHRACEAE</b>      | <i>Clethra castaneifolia</i> Meissner                                      | Hierba del Olvido                                      |
| <b>CLUSIACEAE</b>       | <i>Hypericum laricifolium</i> Jus.                                         | Hierba de la Fortuna                                   |
| <b>CLUSIACEAE</b>       | <i>Hypericum silenoides</i> Jus.                                           | Sentauro                                               |
| <b>COMMELINACEAE</b>    | <i>Tripogandra multiflora</i> (Sw.) Raf.                                   | Cachurros                                              |
| <b>CRASSULACEAE</b>     | <i>Echeveria peruviana</i> Meyen                                           | Pim Pim                                                |
| <b>CRASSULACEAE</b>     | <i>Echeveria peruviana</i> Meyen                                           | Pinpin                                                 |
| <b>CUCURBITACEAE</b>    | <i>Momordica balsamina</i> L.                                              | Balsamina                                              |
| <b>CUCURBITACEAE</b>    | <i>Sicana odorifera</i> (Vell.) Naud.                                      | Secana                                                 |
| <b>CUPRESSACEAE</b>     | <i>Cupressus lusitanica</i> Miller                                         | Cipres                                                 |
| <b>CYPERACEAE</b>       | <i>Cyperus articulatus</i> L.                                              | Varita de San Jose                                     |
| <b>CYPERACEAE</b>       | <i>Oreobolus goeppingeri</i> Sues                                          | Carpintero (Hierba del)                                |
| <b>DIOSCOREACEAE</b>    | <i>Dioscorea tambillensis</i> Kunth                                        | Papa Semitona                                          |
| <b>DIOSCOREACEAE</b>    | <i>Dioscorea trifida</i> L.f.                                              | Papa Madre (Papa Pacta)                                |
| <b>DIPSACACEAE</b>      | <i>Scabiosa atropurpurea</i> L.                                            | Ambarina (Ambarina Negra)                              |
| <b>EPHEDRACEAE</b>      | <i>Ephedra americana</i> H. & B.                                           | Diego Lopez (Suelda con Suelda)                        |
| <b>EQUISETACEAE</b>     | <i>Equisetum giganteum</i> (Wedd.) Ulbrich                                 | Cola de Caballo                                        |
| <b>ERICACEAE</b>        | <i>Bejaria aestuans</i> L.                                                 | Buen Querer (Cadillo, Hierba de la Postema, Purenrosa) |
| <b>ERICACEAE</b>        | <i>Gaultheria erecta</i> Vent.                                             | Mullaca (grande y chico)                               |
| <b>ERICACEAE</b>        | <i>Gaultheria reticulata</i> H.B.K.                                        | Maique (Toromaique)                                    |
| <b>ERYTHROXYLACEAE</b>  | <i>Erythroxylon coca</i> Lam.                                              | Coca                                                   |
| <b>EUPHORBIACEAE</b>    | <i>Alchornea castanaeifolia</i> (Willd.) Jussieu                           | Ipurura                                                |
| <b>EUPHORBIACEAE</b>    | <i>Croton draconoides</i> Muell. Arg. & <i>Croton lechleri</i> Muell. Arg. | Sangre de Grado                                        |
| <b>EUPHORBIACEAE</b>    | <i>Hura crepitans</i> L.                                                   | Abia, Coco de Abilla                                   |
| <b>EUPHORBIACEAE</b>    | <i>Jatropha curcas</i> L.                                                  | Piñones                                                |
| <b>EUPHORBIACEAE</b>    | <i>Jatropha gossypifolia</i> L.                                            | Piñones                                                |
| <b>EUPHORBIACEAE</b>    | <i>Jatropha multifida</i> L.                                               | Piñones                                                |
| <b>EUPHORBIACEAE</b>    | <i>Manhiot esculenta</i> Crantz                                            | Yuca                                                   |
| <b>EUPHORBIACEAE</b>    | <i>Phyllanthus urinaria</i> L.                                             | Chanca Piedra                                          |
| <b>EUPHORBIACEAE</b>    | <i>Phyllanthus niruri</i> L.                                               | Chanca Piedra                                          |
| <b>EUPHORBIACEAE</b>    | <i>Phyllanthus stipulatus</i> (Raf.) Webster                               | Chanca Piedra                                          |
| <b>EUPHORBIACEAE</b>    | <i>Ricinus communis</i> L.                                                 | Piñon                                                  |
| <b>FABACEAE</b>         | <i>Acacia senegal</i> (L.) Willd.                                          | Goma Arabia                                            |
| <b>FABACEAE</b>         | <i>Caesalpinia paipai</i> R. & P.                                          | Pai Pai                                                |
| <b>FABACEAE</b>         | <i>Caesalpinia spinosa</i> (Molina) Kuntze                                 | Talla (Tara)                                           |
| <b>FABACEAE</b>         | <i>Cajanus cajan</i> (L.) Millsp.                                          | Chivato                                                |
| <b>FABACEAE</b>         | <i>Cassia fistula</i> L.                                                   | Caña Fistula                                           |

|                 |                                                |                                                           |
|-----------------|------------------------------------------------|-----------------------------------------------------------|
| FABACEAE        | <i>Copaifera paupera</i> (Herz.) Dwyer.        | Aciete de Copaiba                                         |
| FABACEAE        | <i>Desmodium molliculum</i> (H.B.K.) DC.       | Manayupa (Pie de Perro, Pata de Perro, Chancas de Comida) |
| FABACEAE        | <i>Desmodium triflorum</i> (L.) DC             | Pega Pega                                                 |
| FABACEAE        | <i>Ormosia</i> sp.                             | Huayruro (Semilla)                                        |
| FABACEAE        | <i>Erythrina</i> spp.                          | Huailulo, Mishquina                                       |
| FABACEAE        | <i>Lathyrus odoratus</i> L.                    | Tacon                                                     |
| FABACEAE        | <i>Leucaena leucocephala</i> (Lam.) De Wit     | Arabisca                                                  |
| FABACEAE        | <i>Lupinus mutabilis</i> Sweet                 | Chocho                                                    |
| FABACEAE        | <i>Mimosa albida</i> H. & B.                   | Tapa Tapa                                                 |
| FABACEAE        | <i>Mimosa polydactyla</i> H. & B.              | Sensitiva                                                 |
| FABACEAE        | <i>Mucuna rostrata</i> Benth.                  | Habilla (chica y grande)                                  |
| FABACEAE        | <i>Myroxylon balsamum</i> (L.) Harms.          | Palo Balsamo (Quina Quina, Balsamo)                       |
| FABACEAE        | <i>Senna monilifera</i> H.S. Irwin & Bowley    | Hoja de Sen                                               |
| FABACEAE        | <i>Senna occidentalis</i> (L.) Link.           | Retana (Retania)                                          |
| FABACEAE        | <i>Spartium junceum</i> L.                     | Retama                                                    |
| FABACEAE        | <i>Trifolium repens</i> L.                     | Trebol (Trebol de Agua)                                   |
| FABACEAE        | <i>Zornia reticulata</i> Sm.                   | Hierba de la Vibora                                       |
| GENTIANACEAE    | <i>Gentianella alborosea</i> (Grimes) Pringle  | Hercampuri                                                |
| GENTIANACEAE    | <i>Gentianella bicolor</i> (Wedd.) J. Pringle  | Corpus Way (Hornamo Leon)                                 |
| GENTIANACEAE    | <i>Gentianella crasicaulis</i> J. Pringle      | Hojas de Violeta                                          |
| GENTIANACEAE    | <i>Gentianella dianthoides</i> (H.B.K.) Fabris | Amargon (Genciana)                                        |
| GENTIANACEAE    | <i>Gentianella graminea</i> (H.B.K.) Fabris    | Chinchimali (Sumaran)                                     |
| GENTIANACEAE    | <i>Gentianella</i> sp.                         | Anga Macha                                                |
| GERANIACEAE     | <i>Erodium cicutarium</i> (L.) L'Herit.        | Agujilla                                                  |
| GERANIACEAE     | <i>Geranium ayavacense</i> Willd ex H.B.K.     | Pachachanga (Pachuchuaca, Miscamisca)                     |
| GERANIACEAE     | <i>Geranium sesiliflorum</i> Cavanilles        | Pasuchaca (Miscamisca)                                    |
| GERANIACEAE     | <i>Pelargonium odoratissimum</i> (L.) L'Herit. | Malva de olor (Malva de Oro, Olorosa)                     |
| HIPPOCRATEACEAE | <i>Tontelea crassifolia</i> (Mart.) Spreng.    | Bejuco de Montaña                                         |
| ILLICIAEAE      | <i>Illicium verum</i> Hook. f.                 | Anis Estrella                                             |
| JUGLANDACEAE    | <i>Juglans neotropica</i> Diels                | Nogal                                                     |
| LAMIACEAE       | <i>Hyptis sidifolia</i> (L'Her.) Briq.         | Albaca de Campo (Serrana), Pedorera                       |
| LAMIACEAE       | <i>Lavandula angustifolia</i> Miller           | Alhucema                                                  |
| LAMIACEAE       | <i>Lepechinia meyenii</i> (Walpers) Epling     | Salvia (Real), Salvia Paraguay                            |
| LAMIACEAE       | <i>Marrubium vulgare</i> L.                    | Chancaz de Muerto, Cordon de Muerto, Corontilla           |
| LAMIACEAE       | <i>Melisa officinalis</i> L.                   | Melisa (Toronjil)                                         |
| LAMIACEAE       | <i>Mentha spicata</i> L.                       | Hierba Buena (Menta)                                      |
| LAMIACEAE       | <i>Mentha x piperita</i> L.                    | Poleo                                                     |
| LAMIACEAE       | <i>Minthostachys mollis</i> Griesebach         | Muña                                                      |
| LAMIACEAE       | <i>Ocimum basilicum</i> L.                     | Albaca (Albahaca)                                         |
| LAMIACEAE       | <i>Origanum majorana</i> L.                    | Mejorana                                                  |
| LAMIACEAE       | <i>Origanum vulgare</i> L.                     | Oregano                                                   |
| LAMIACEAE       | <i>Otholobium glandulosum</i> (L.) Grimes      | Culein                                                    |
| LAMIACEAE       | <i>Rosmarinus officinalis</i> L.               | Romero (Romero Castilla)                                  |
| LAMIACEAE       | <i>Salvia discolor</i> H.B.K.                  | Llatama                                                   |
| LAMIACEAE       | <i>Salvia rosmarinifolia</i> Hort. ex G. Don.  | Romero Blanco (Romero Silvestre y Romero del Campo)       |
| LAMIACEAE       | <i>Salvia tubiflora</i> R. & P.                | Chochocon, Hierba del Mal Aire, Paja del Aire             |
| LAMIACEAE       | <i>Satureja elliptica</i> (R. & P.) Briq.      | Chipita                                                   |
| LAMIACEAE       | <i>Satureja pulchella</i> (H.B.K.) Briquet     | Panisara (Panizara)                                       |
| LAMIACEAE       | <i>Stachys arvensis</i> L.                     | Hierba Terrestre                                          |
| LAMIACEAE       | <i>Thymus vulgaris</i> L.                      | Tomillo                                                   |
| LAURACEAE       | <i>Aniba roseadora</i> Ducke                   | Palo Rosa                                                 |

|                        |                                                          |                                            |
|------------------------|----------------------------------------------------------|--------------------------------------------|
| <b>LAURACEAE</b>       | <i>Nectandra floribunda</i> Nees                         | Espingo, Ishpingo                          |
| <b>LAURACEAE</b>       | <i>Nectandra reticulata</i> (R. & P.) Mez.               | Espingo (semilla, flor, amarillo/blanco)   |
| <b>LAURACEAE</b>       | <i>Persea americana</i> Mill.                            | Palta                                      |
| <b>LAURACEAE</b>       |                                                          | Asmala                                     |
| <b>LICHENES</b>        | <i>Siphula</i> sp.                                       | Papelillo                                  |
| <b>LILIACEAE</b>       | <i>Allium sativum</i> L.                                 | Ajo Macho                                  |
| <b>LILIACEAE</b>       | <i>Hesperocephalum niveum</i> (Rav.) Rav.                | Hierba de la Justicia                      |
| <b>LINACEAE</b>        | <i>Linum sativum</i> L.                                  | Linaza                                     |
| <b>LINACEAE</b>        | <i>Linum usitatissimum</i> L.                            | Linaza                                     |
| <b>LOASACEAE</b>       | <i>Mentzelia cordifolia</i> Dombey                       | Anguarate                                  |
| <b>LOGANIACEAE</b>     | <i>Buddleja utilis</i> Kraenzl.                          | Flor Blanca                                |
| <b>LYCOPODIACEAE</b>   | <i>Huperzia crassa</i> (H. & B. ex Willd.) Rothm.        | Condor (Condores)                          |
| <b>LYCOPODIACEAE</b>   | <i>Lycopodium jusiaei</i> Desv. ex Poir                  | Hierba del Hombre                          |
| <b>LYCOPODIACEAE</b>   | <i>Lycopodium thyoides</i> H. & B. ex Willd.             | Trencilla (Roja)                           |
| <b>LYTHRACEAE</b>      | <i>Cuphea racemosa</i> (L.f.) Spreng.                    | Hierba del Coche                           |
| <b>LYTHRACEAE</b>      | <i>Cuphea strigulosa</i> H.B.K.                          | Hierba de Toro (Lancetilla, Sanguinaria)   |
| <b>MALPIGHIACEAE</b>   | <i>Banisteriopsis caapii</i> (Spruce ex Grieseb.) Morton | Ayahuasca                                  |
| <b>MALVACEAE</b>       | <i>Abelmoschus moschatus</i> Medikus                     | Hierba de Culebra                          |
| <b>MALVACEAE</b>       | <i>Alcea rosea</i> (L.) Cavanilles                       | Malva de Lavado                            |
| <b>MALVACEAE</b>       | <i>Malva parviflora</i> L.                               | Malva real (Malva Blanca)                  |
| <b>MELASTOMATACEAE</b> | <i>Brachyotum tyrianthium</i> Macbride                   | Sarcilleja                                 |
| <b>MELIACEAE</b>       | <i>Trichilia</i> spp.                                    | Pucho                                      |
| <b>MENISPERMACEAE</b>  | <i>Abuta grandiflora</i> (Mart.) Sand.                   | Abuta                                      |
| <b>MONIMIACEAE</b>     | <i>Peumus boldus</i> Molina                              | Boldo                                      |
| <b>MONIMIACEAE</b>     | <i>Siparuna muricata</i> (R. & P.) A. DC.                | Añascero (Añascero, y Añascero chico)      |
| <b>MORACEAE</b>        | <i>Brosimum rubescens</i> Taubert                        | Murure, Palo Sangre                        |
| <b>MORACEAE</b>        | <i>Ficus carica</i> L.                                   | Higo                                       |
| <b>MORACEAE</b>        | <i>Morus alba</i> L.                                     | Morera                                     |
| <b>MUSACEAE</b>        | <i>Musa x paradisiaca</i> L.                             | Beldaco, Platano                           |
| <b>MYRICACEAE</b>      | <i>Myricaria dubia</i> (H.B.K.) McVaugh.                 | Camu Camu                                  |
| <b>MYRISTICACEAE</b>   | <i>Myristica fragrans</i> L.                             | Nuez moscada                               |
| <b>MYRTACEAE</b>       | <i>Eucalyptus globulus</i> Labill.                       | Eucalipto                                  |
| <b>MYRTACEAE</b>       | <i>Eugenia obtusifolia</i> Cambes.                       | Lanchi (Rumilanchi, Unquia)                |
| <b>MYRTACEAE</b>       | <i>Myrcianthes discolor</i> (H.B.K.) Vaughn,             | Lanche                                     |
|                        | <i>Myrcianthes fragrans</i> (Sw) McVaugh                 |                                            |
| <b>MYRTACEAE</b>       | <i>Psidium guajava</i> L.                                | Guanabana (Graviola, hoja)                 |
| <b>NYCTAGINACEAE</b>   | <i>Mirabilis jalapa</i> L.                               | Buenas Tardes                              |
| <b>OLACACEAE</b>       | <i>Heisteria acuminata</i> (H. & B.) Engler              | Chuchuasi (Chuchuhuasi)                    |
| <b>OLACACEAE</b>       | <i>Ximenia americana</i> L.                              | Limoncillo                                 |
| <b>OLEACEAE</b>        | <i>Olea europaea</i> L.                                  | Hoja de Olivo                              |
| <b>ONAGRACEAE</b>      | <i>Oenothera rosea</i> Aiton                             | Hierba del Dominio, Chupa Sangre           |
| <b>ORCHIDACEAE</b>     | <i>Aa paleacea</i> (H.B.K.) Rchb. f.                     | Hierba de la Soledad                       |
| <b>ORCHIDACEAE</b>     | <i>Lycaste gigantea</i> Lindl.                           | Caña Caña                                  |
| <b>ORCHIDACEAE</b>     | <i>Stelis</i> sp.                                        | Cucharilla                                 |
| <b>ORCHIDACEAE</b>     | <i>Stelis eublepharis</i> Rchb. f.                       | Boton de Oro (Hierba del Oro, Vara de Oro) |
| <b>OXALIDACEAE</b>     | <i>Oxalis peduncularis</i> H.B.K.                        | Chulco                                     |
| <b>PAPAVERACEAE</b>    | <i>Argemone mexicana</i> L.                              | Cardo Santo                                |
| <b>PASSIFLORACEAE</b>  | <i>Passiflora caerulea</i> L.                            | Pasionara                                  |
| <b>PASSIFLORACEAE</b>  | <i>Passiflora ligularis</i> Jus.                         | Cascara/Hoja de Granadilla                 |
| <b>PASSIFLORACEAE</b>  | <i>Passiflora quardrangularis</i> L.                     | Tumbo                                      |
| <b>PHYTOLACCACEAE</b>  | <i>Petiveria alliacea</i> L.                             | Mocura (Mucura)                            |
| <b>PHYTOLACCACEAE</b>  | <i>Phytolacca bogotensis</i> H.B.K.                      | Ilambo, Laylambo, Choco Chocho             |
| <b>PHYTOLACCACEAE</b>  | <i>Phytolacca rivinoides</i> Kunth & Bouché              | Guaylango                                  |

|                         |                                                                      |                                       |
|-------------------------|----------------------------------------------------------------------|---------------------------------------|
| <b>PHYTOLACCACEAE</b>   | <i>Phytolacca weberbaueri</i> H. Walter                              | Santo Tome (Santo Tone)               |
| <b>PINACEAE</b>         | <i>Pinus patula</i> Schldl. & Cham.                                  | Pino                                  |
| <b>PIPERACEAE</b>       | <i>Peperomia fraseri</i> C. DC.                                      | Hierba de la Plata / del Dolar        |
| <b>PIPERACEAE</b>       | <i>Peperomia galioides</i> H.B.K.                                    | Congonilla                            |
| <b>PIPERACEAE</b>       | <i>Peperomia inaequalifolia</i> R. & P.                              | Congona                               |
| <b>PIPERACEAE</b>       | <i>Piper aduncum</i> L.                                              | Matico                                |
| <b>PIPERACEAE</b>       | <i>Piper cf. aequale</i> Vahl.                                       | Mogoquero                             |
| <b>PLANTAGINACEAE</b>   | <i>Plantago major</i> L.                                             | Llantén                               |
| <b>PLANTAGINACEAE</b>   | <i>Plantago sericea</i> R. & P. subsp. <i>sericans</i> (Pilger) Rahn | Paja Blanca                           |
| <b>PLANTAGINACEAE</b>   | <i>Plantago sericea</i> R. & P. var. <i>lanuginosa</i> Grieseb.      | Pajilla Blanca                        |
| <b>POACEAE</b>          | <i>Arundo donax</i> L.                                               | Carizo                                |
| <b>POACEAE</b>          | <i>Cymbopogon citratus</i> (DC.) Stapf.                              | Hierba Luisa                          |
| <b>POACEAE</b>          | <i>Cynodon dactylon</i> (L.) Persoon                                 | Gramma Dulce                          |
| <b>POACEAE</b>          | <i>Hordeum vulgare</i> L.                                            | Cebada                                |
| <b>POACEAE</b>          | <i>Olyra latifolia</i> L.                                            | Cuña - Cuña                           |
| <b>POACEAE</b>          | <i>Triticum sativum</i> L.                                           | Trigo                                 |
| <b>POACEAE</b>          | <i>Zea mays</i> L.                                                   | Chingo                                |
| <b>POLEMONIACEAE</b>    | <i>Cantua quercifolia</i> Jus.                                       | Dormidero                             |
| <b>POLYGALACEAE</b>     | <i>Polygala paniculata</i> L.                                        | Canchalagua Grande                    |
| <b>POLYGONACEAE</b>     | <i>Polygonum hydropiperoides</i> Michaux                             | Pica Pica (Hierba de Pica Flor)       |
| <b>POLYPODIACEAE</b>    | <i>Cheilanthes myriophylla</i> Desv.                                 | Hierba del Dominio                    |
| <b>POLYPODIACEAE</b>    | <i>Notholaena nivea</i> (Poir.) Desv.                                | Doradilla                             |
| <b>POLYPODIACEAE</b>    | <i>Polypodium crassifolium</i> L.                                    | Calagualla (Lengua de Ciervo)         |
| <b>PUNICACEAE</b>       | <i>Punica granatum</i> L.                                            | Cascura de Granada                    |
| <b>RANUNCULACEAE</b>    | <i>Laccopetalum giganteum</i> (Wedd.) Ulbrich                        | Huamanripa (Pacra)                    |
| <b>ROSACEAE</b>         | <i>Cydonia oblonga</i> Miller                                        | Membrillo                             |
| <b>ROSACEAE</b>         | <i>Geum peruvianum</i> Focke                                         | Valeriana                             |
| <b>ROSACEAE</b>         | <i>Polylepsis racemosa</i> R. & P.                                   | Quinual                               |
| <b>ROSACEAE</b>         | <i>Rosa centifolia</i> L.                                            | Flor de Rosa de Castilla (Rosas)      |
| <b>ROSACEAE</b>         | <i>Rubus robustus</i> C. Presl.                                      | Mora (Zarzamora)                      |
| <b>ROSACEAE</b>         | <i>Sanguisorba minor</i> Scop.                                       | Pimpinela                             |
| <b>RUBIACEAE</b>        | <i>Cinchona officinalis</i> L.                                       | Cortezas, Cascarilla                  |
| <b>RUBIACEAE</b>        | <i>Coffea arabica</i> L.                                             | Cafeto                                |
| <b>RUBIACEAE</b>        | <i>Uncaria guianensis</i> (Aubl.) Gmelin                             | Paraguay                              |
| <b>RUBIACEAE</b>        | <i>Uncaria tomentosa</i> (Willdenow ex Roemer & Schultes) DC.        | Uña de Gato                           |
| <b>RUIACEAE</b>         | <i>Morinda citrifolia</i> L.                                         | Noni                                  |
| <b>RUTACEAE</b>         | <i>Citrus aurantium</i> L.                                           | Hoja de Naranja                       |
| <b>RUTACEAE</b>         | <i>Citrus medica</i> L.                                              | Cidra                                 |
| <b>RUTACEAE</b>         | <i>Gardenia augusta</i> (L.) Merr.                                   | Margarita                             |
| <b>RUTACEAE</b>         | <i>Ruta graveolens</i> L.                                            | Ruda                                  |
| <b>SALICACEAE</b>       | <i>Salix chilensis</i> Molina                                        | Sauce                                 |
| <b>SAPINDACEAE</b>      | <i>Dodonea viscosa</i> Jacquin                                       | Chamana                               |
| <b>SAPINDACEAE</b>      | <i>Sapindus saponaria</i> L.                                         | Checo                                 |
| <b>SAPOTACEAE</b>       | <i>Pouteria lucuma</i> (R. & P.) Kuntze                              | Lucumo                                |
| <b>SAXIFRAGACEAE</b>    | <i>Escallonia pendula</i> (R. & P.) Pers.                            | Chachacon                             |
| <b>SCROPHULARIACEAE</b> | <i>Caprania peruviana</i> Bentham                                    | Arenilla (Flor Arenilla, Te de Indio) |
| <b>SCROPHULARIACEAE</b> | <i>Escobedia grandiflora</i> (L.f.) Kuntze                           | Azafran, Suna                         |
| <b>SCROPHULARIACEAE</b> | <i>Galvesia fruticosa</i> J. Gmelin                                  | Curil, Macacha                        |
| <b>SIMAROUBACEAE</b>    | <i>Quassia amara</i> L.                                              | Quasia                                |
| <b>SMILACACEAE</b>      | <i>Smilax kunthii</i> Killip & Morton                                | Palo de la China                      |
| <b>SMILACACEAE</b>      | <i>Smilax medica</i> M. Martens & Galeotti                           | Zarzaparilla                          |

|                         |                                                        |                                                                     |
|-------------------------|--------------------------------------------------------|---------------------------------------------------------------------|
| <b>SOLANACEAE</b>       | <i>Brugmansia arborea</i> (L.) Lagerheim               | Floripondio (Micha Churandero, Micha Blanca, Micha Rastrera, Misha) |
| <b>SOLANACEAE</b>       | <i>Brugmansia candida</i> Persoon                      | Misha Blanca (Micha Rosada, Rastrera, Blanca)                       |
| <b>SOLANACEAE</b>       | <i>Brugmansia sanguinea</i> (R. & P.) D. Don.          | Micha Negra (Roja, Rastrera, Blanca)                                |
| <b>SOLANACEAE</b>       | <i>Cestrum auriculatum</i> L'Herit                     | Agrasejo (Hierba Santa, Sangre Maria, Santa Maria)                  |
| <b>SOLANACEAE</b>       | <i>Datura ferox</i> L.                                 | Chamico                                                             |
| <b>SOLANACEAE</b>       | <i>Jaltomata</i> sp.                                   | Sémulo                                                              |
| <b>SOLANACEAE</b>       | <i>Juanulloa ochracea</i> Cuatrecasas                  | Cuya Cuya (semilla)                                                 |
| <b>SOLANACEAE</b>       | <i>Lycopersicon peruvianum</i> (L.) Mill.              | Tomate de Monte                                                     |
| <b>SOLANACEAE</b>       | <i>Nicotiana rustica</i> L.                            | Tabaco negro                                                        |
| <b>SOLANACEAE</b>       | <i>Nicotiana tabacum</i> L.                            | Hoja de Tabaco (y Tabaco Rubio)                                     |
| <b>SOLANACEAE</b>       | <i>Solanum americanum</i> Mill.                        | Baja del Espanto (Hierba Mora)                                      |
| <b>SOLANACEAE</b>       | <i>Solanum mammosum</i> L.                             | Torosimuri                                                          |
| <b>STERCULIACEAE</b>    | <i>Melochia lupulina</i> Sw.                           | Chantilla                                                           |
| <b>STERCULIACEAE</b>    | <i>Theobroma cacao</i> L.                              | Cascara Cacao                                                       |
| <b>THELYPTERIDACEAE</b> | <i>Thelypteris</i> cf. <i>scalaris</i> (Christ.) Alton | Helecha Macho                                                       |
| <b>THYMELEACEAE</b>     | <i>Daphnopsis weberbaueri</i> Domke                    | Cholitos (Baron), Hembra                                            |
| <b>TROPAEOLACEAE</b>    | <i>Tropaeolum minus</i> L.                             | Mastuerzo                                                           |
| <b>TYPHACEAE</b>        | <i>Typha angustifolia</i> L.                           | Chace                                                               |
| <b>ULMACEAE</b>         | <i>Celtis schippii</i> Standl.                         | Palo Huaco                                                          |
| <b>URTICACEAE</b>       | <i>Pilea microphylla</i> (L.) Lieberman                | Contra Hierba                                                       |
| <b>URTICACEAE</b>       | <i>Urtica magellanica</i> A. Jussieu ex Poiret         | Hortiga (Comun, Ortiga, Ortiga Negra, Ortiga Chica)                 |
| <b>URTICACEAE</b>       | <i>Urtica</i> spp.                                     | Hortiga de Leon                                                     |
| <b>VALERIANACEAE</b>    | <i>Phyllactis rigida</i> (R. & P.) Persoon             | Estrella                                                            |
| <b>VALERIANACEAE</b>    | <i>Valeriana plantaginea</i> Kunth                     | Hornamo Morada                                                      |
| <b>VERBENACEAE</b>      | <i>Aloysia triphylla</i> (L. Her.) Britt.              | Cedron                                                              |
| <b>VERBENACEAE</b>      | <i>Clerodendron</i> sp.                                | Brochamelia                                                         |
| <b>VERBENACEAE</b>      | <i>Lippia alba</i> (L.) N.E. Br.                       | Mestruante                                                          |
| <b>VERBENACEAE</b>      | <i>Verbena littoralis</i> H.B.K.                       | Verbena                                                             |
| <b>VIOLACEAE</b>        | <i>Viola tricolor</i> L.                               | Hierba de Pensamiento, Violeta                                      |
| <b>XYRIDACEAE</b>       | <i>Xyris subulata</i> R. & P.                          | Hierba del Caballero                                                |
| <b>ZINGIBERACEAE</b>    |                                                        | Chima Pampana                                                       |
| Various species         |                                                        | Barbasco                                                            |
| Commercial mixture      |                                                        | Siete condores                                                      |
| Commercial mixture      |                                                        | Siete hornamos                                                      |
| Commercial mixture      |                                                        | Siete mishas                                                        |
| Commercial mixture      |                                                        | Siete Raices                                                        |
| Commercial mixture      |                                                        | Siete trinzias                                                      |
| Unidentified            |                                                        | Chichiricoma                                                        |
| Unidentified            |                                                        | Abedul                                                              |
| Unidentified            |                                                        | Adan y Eva                                                          |
| Unidentified            |                                                        | Alguárate                                                           |
| Unidentified            |                                                        | Alquitecta                                                          |
| Unidentified            |                                                        | Añisero                                                             |
| Unidentified            |                                                        | Cachorillo                                                          |
| Unidentified            |                                                        | Candelilla                                                          |
| Unidentified            |                                                        | Casiburón                                                           |
| Unidentified            |                                                        | Cerrilla                                                            |
| Unidentified            |                                                        | Cestisa                                                             |
| Unidentified            |                                                        | Chantipa                                                            |
| Unidentified            |                                                        | Chapuro                                                             |
| Unidentified            |                                                        | Chiricana                                                           |
| Unidentified            |                                                        | Doradilla Amarilla                                                  |
| Unidentified            |                                                        | Doradilla Blanca                                                    |
